# Supplementary material for: Highly efficient and self-supported 3D carbon nanotube composite electrode for enhanced oxygen reduction reaction
Source: Royal Society of Chemistry journal article supplement (doi:10.1039/d1ra07973e), 2021-01-01
Supplement: d1ra07973e1.pdf [file d1ra07973e1.pdf]

## **Supporting Information**

### **Highly efficient and self-supported 3D carbon nanotube composite electrode for enhanced oxygen reduction reaction**

Bo Zheng, \* Yue Zhou, Zhaorui Pan, Guangxiang Liu, \* and Leiming Lang \*

Excellent Science and Technology Innovation Group of Jiangsu Province, Nanjing  
Xiaozhuang University, Nanjing 211171, China.

Email address:

zhengbo7991@163.com (B. Zheng);

njuliugx@126.com (G.X. Liu);

langleiming@njxzc.edu.cn (L.M. Lang)

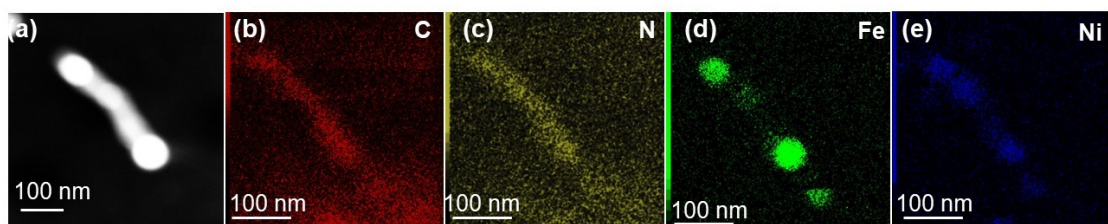

Fig. S1 High angle annular dark field scanning transmission electron microscopy (HAADF-STEM) image and the corresponding EDS mapping of C, N, Fe and Ni element of the FMPN-700.

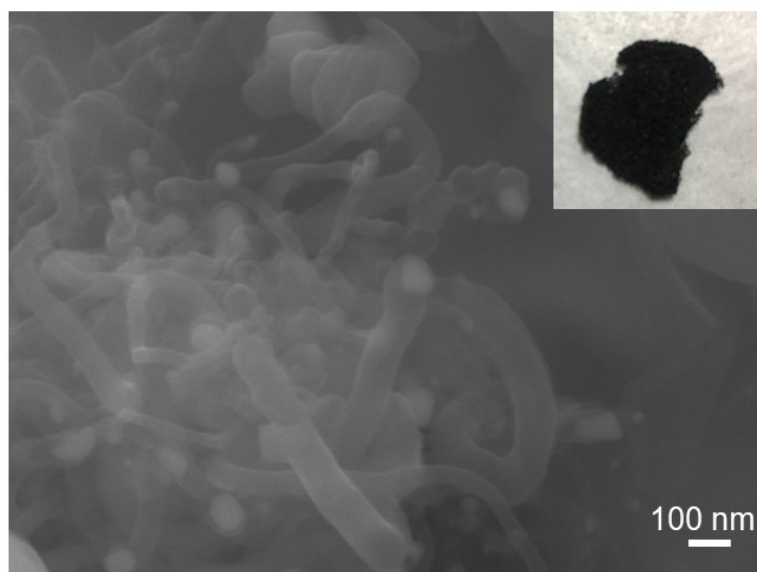

Fig. S2 SEM image of GMPN-800. The inset showed its brittleness.

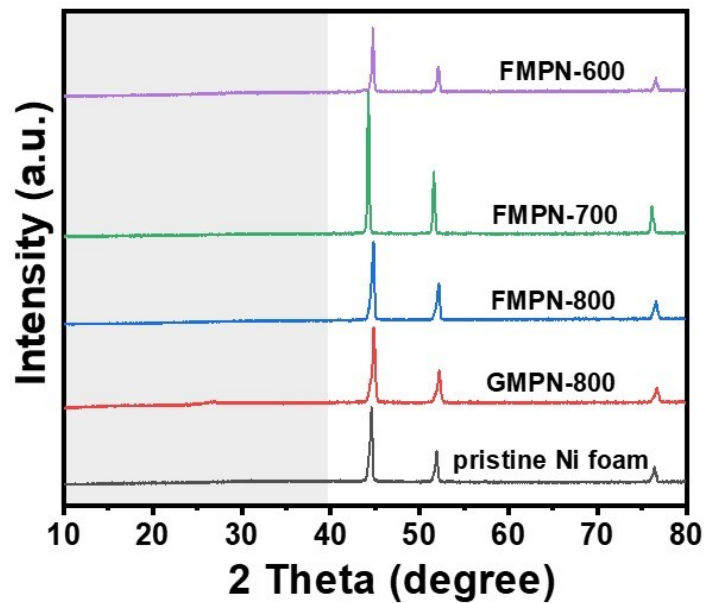

Fig. S3 XRD patterns of the pristine Ni foam, GMPN-800, FMPN-800, FMPN-700 and FMPN-600 samples.

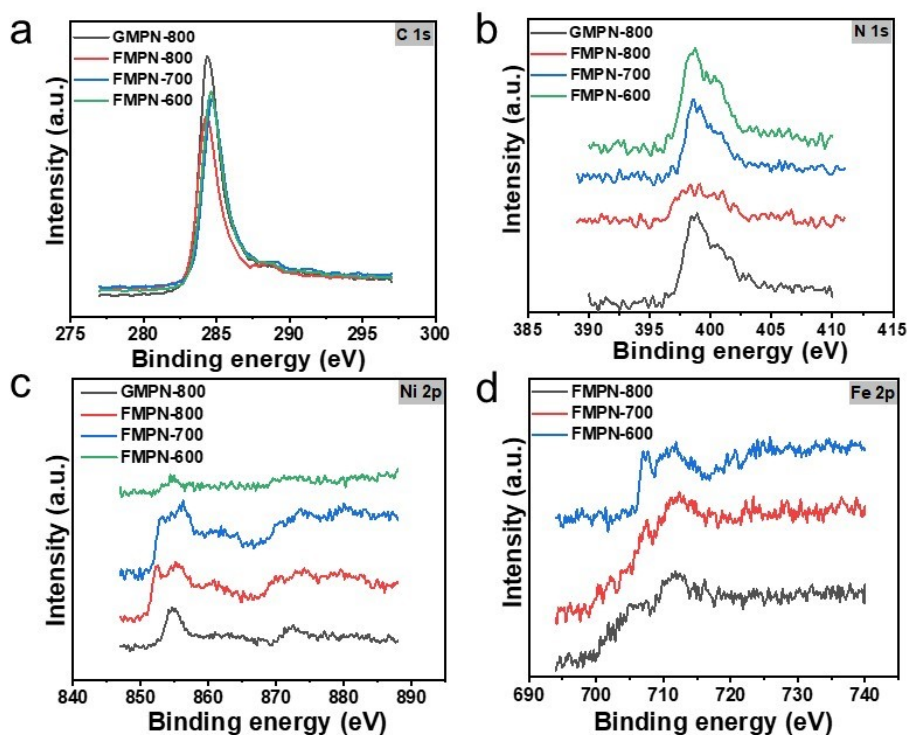

Fig. S4 High -resolution C1s, N1s, Ni 2p and Fe 2p spectra of GMPN-800, FMPN-800, FMPN-700 and FMPN-600 samples.

Table S1. Elemental composition of C, N, O, Ni and Fe in the as-prepared samples.

| Sample        | C (at%) | N(at%) | O(at%) | Ni(at%) | Fe(at%) |
|---------------|---------|--------|--------|---------|---------|
| GMPN-800-acid | 88.49   | 4.39   | 5.81   | 1.31    |         |
| FMPN-800      | 78.67   | 3.90   | 12.25  | 3.21    | 1.97    |
| FMPN-700      | 80.78   | 4.12   | 10.33  | 2.64    | 2.14    |
| FMPN-600      | 84.00   | 6.12   | 7.90   | 0.60    | 1.37    |

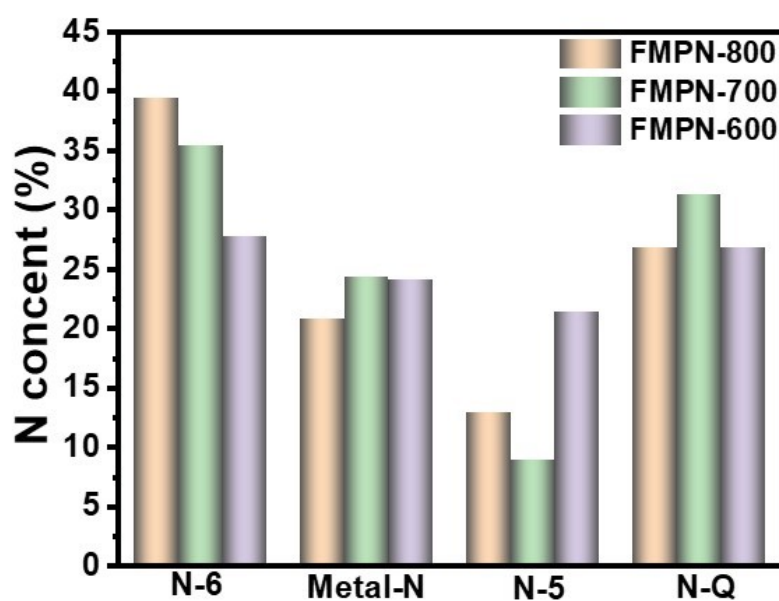

Fig. S5 Comparison of the N bonding configurations of FMPN-800, FMPN-700 and FMPN-600 samples.

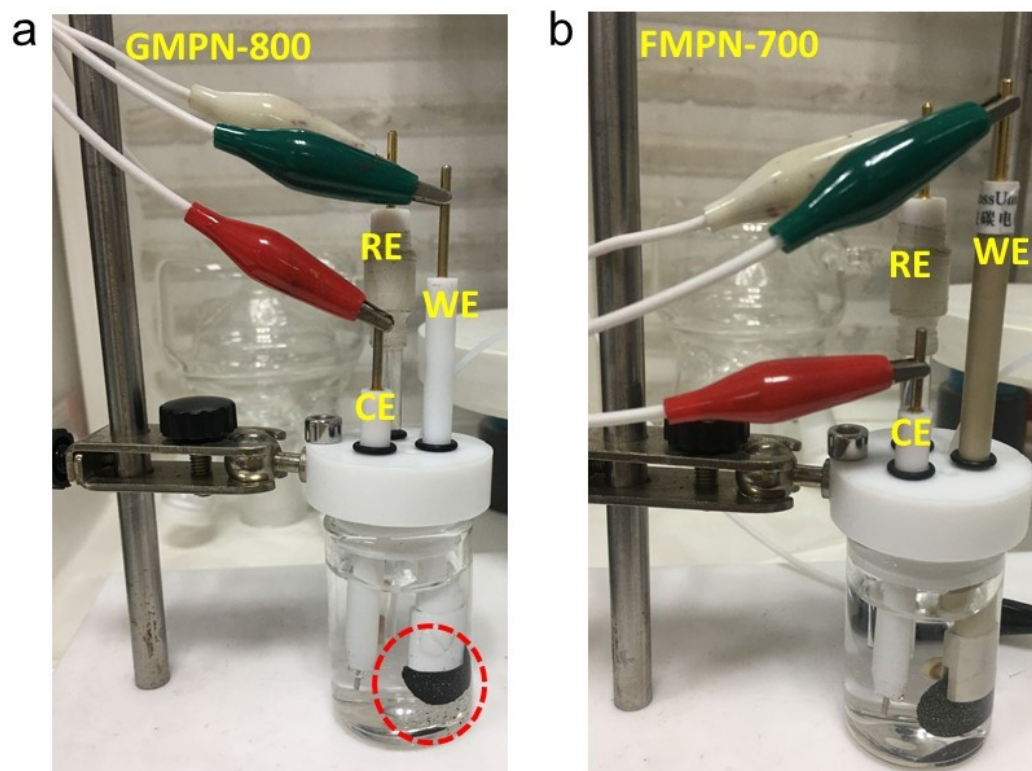

Fig. S6 Digital photos of the GMPN-800 (a) and FMPN-700 (b) working electrodes during electrochemical measurement.

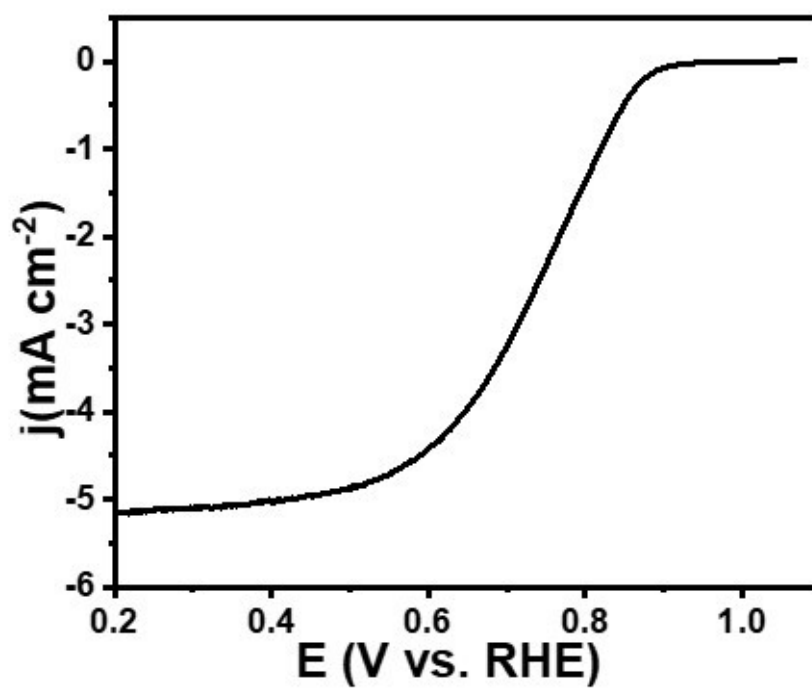

Fig. S7 LSV curve of the FMPN-700-acid catalyst on the RDE by LSV at 1600 rpm.

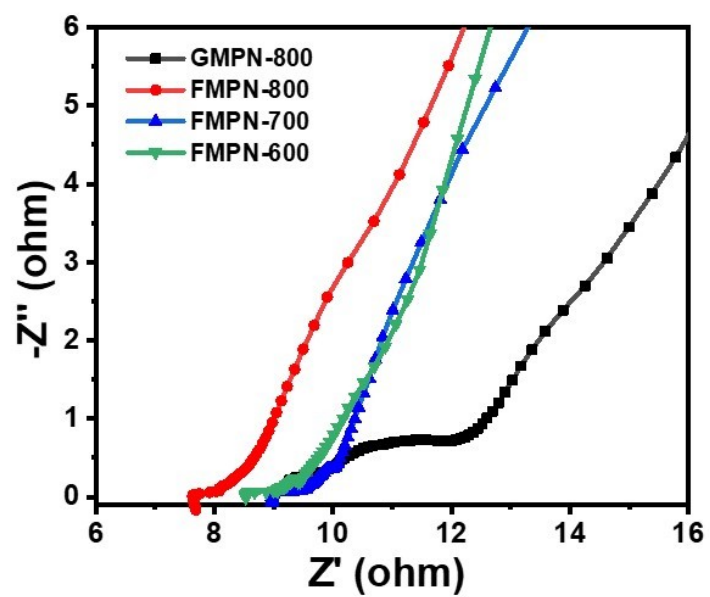

Fig. S8 Nyquist plots of GMPN-800, FMPN-800, FMPN-700 and FMPN-600.
